# Supplementary material for: Comprehensive Analysis of Angiogenesis subtype of Squamous Cell Carcinoma
Source: Research Square preprint supplement (doi:10.21203/rs.3.rs-209223/v2), 2021-04-21
Supplement: Supplementary file 1 [file 17da0f03f02a636178da7380.xlsx]

## Sheet: Sheet1
Table1：Characteristic of SCC patients
characteristic	TCGA cohort (n=1368)	subtype1 cohort (n=951)	subtype2 cohort (n=417)
Age
<=41	108	41	67
>41	1250	900	350
NA	10	10	0
Gender
Male	836	656	180
Female	532	295	237
Cancer type
CESC	252	60	192
ESCA	95	74	21
HNSC	520	420	100
LUSC	501	397	104
Grade
Grade I	90	66	24
Grade II	461	313	148
Grade III	248	135	113
Grade IV	8	6	2
NA	561	431	130
Clinical stage
Stage I	146	44	102
Stage II	186	116	70
Stage III	160	104	56
Stage IV	303	235	68
NA	573	452	121
Tumor status
Alive	840	597	276
Dead	528	258	114
NA	123	96	27
